# Supplementary material for: Levofloxacin versus placebo for the treatment of latent tuberculosis among contacts of patients with multidrug-resistant tuberculosis (the VQUIN MDR trial): a protocol for a randomised controlled trial
Source: PubMed Central journal article supplement — BMJ Open. 2020 Jan 2;10(1):e033945. doi: 10.1136/bmjopen-2019-033945 (PMC6955503; doi:10.1136/bmjopen-2019-033945), 2020-01-02
Supplement: bmjopen-2019-033945.reviewer_comments.pdf [file bmjopen-2019-033945.reviewer_comments.pdf]

## PEER REVIEW HISTORY

BMJ Open publishes all reviews undertaken for accepted manuscripts. Reviewers are asked to complete a checklist review form (<http://bmjopen.bmj.com/site/about/resources/checklist.pdf>) and are provided with free text boxes to elaborate on their assessment. These free text comments are reproduced below.

## ARTICLE DETAILS

|                            |                                                                                                                                                                                                                                                   |
|----------------------------|---------------------------------------------------------------------------------------------------------------------------------------------------------------------------------------------------------------------------------------------------|
| <b>TITLE (PROVISIONAL)</b> | Levofloxacin versus placebo for the treatment of latent tuberculosis among contacts of patients with multidrug-resistant tuberculosis (The VQUIN MDR Trial): a protocol for a randomized controlled trial                                         |
| <b>AUTHORS</b>             | Fox, Greg; Nguyen, Cam Binh; Nguyen, Thu Anh; Tran, Phuong Thuy; Maris, B; Graham, Steve; Nguyen, Binh Hoa; Velen, Kavi; Dowdy, DW; Mason, Paul; Britton, Warwick; Behr, Marcel; Benedetti, Andrea; Menzies, Dick; Nguyen, Viet Nhung; Marks, Guy |

This article was not externally reviewed at BMJ Open. Protocols that have been independently assessed prior to submission to BMJ Open are usually fast-tracked to publication on the grounds that further substantial changes will not be possible. This independent assessment will usually be external, independent review for both a substantial grant award from a non-commercial or government funder and ethics approval.
